# Supplementary material for: Maternal and fetal outcomes of pregnant women with type 1 diabetes, a national population study
Source: PubMed Central journal article supplement (PMC5655230; doi:10.18632/oncotarget.20952), 2017-09-16
Supplement: oncotarget-08-80679-s001.pdf [file oncotarget-08-80679-s001.pdf]

# Maternal and fetal outcomes of pregnant women with type 1 diabetes, a national population study

## SUPPLEMENTARY MATERIALS

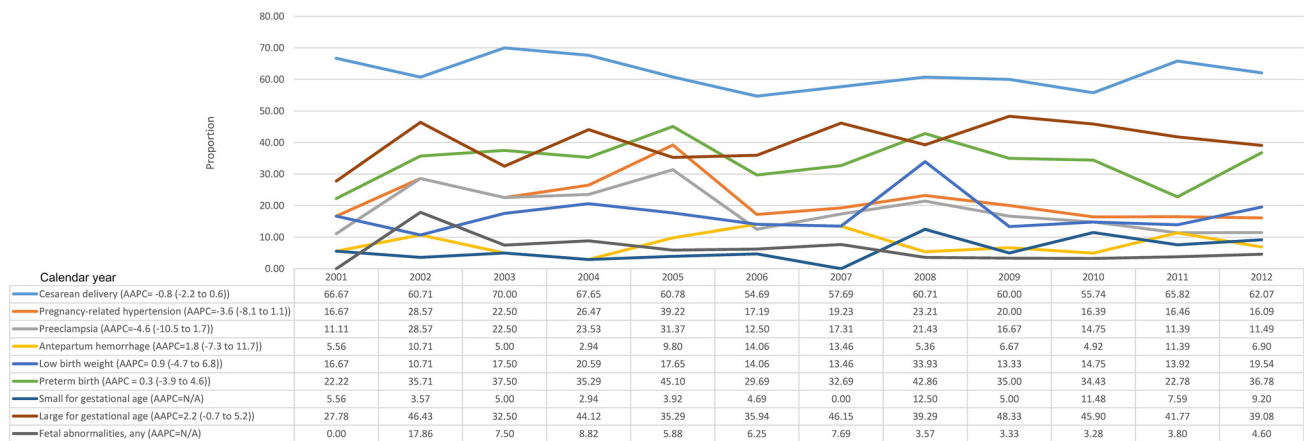

**Supplementary Figure 1: The trend of pregnancy outcomes in women with type 1 diabetes from 2001 to 2012.** The changes of outcome rate in pregnant women with type 1 diabetes were evaluated using Jointpoint regression analysis. Results are proportions of event and annual average percentage change (AAPC) with 95% confidence interval.

**Supplementary Table 1: International Classification of Diseases, ninth revision (ICD-9) codes, Diagnosis-Related Group (DRG) codes, and items of birth registry used in this study.** See Supplementary\_Table\_1
